# Supplementary material
Source: PubMed Central journal article supplement (PMC2063489)
Supplement: 7601847s7.pdf [file 7601847s7.pdf]

Supplementary Table I: Summary of all Rga2p phosphopeptides identified in this study using mass spectrometry

| Residues  | Peptide                                                | <i>in vitro</i> |            | <i>in vivo</i> |               |                |
|-----------|--------------------------------------------------------|-----------------|------------|----------------|---------------|----------------|
|           |                                                        | Pho85-Pcl2      | Cdc28-Cln2 | wild-type      | <i>pho85Δ</i> | <i>cln1,2Δ</i> |
| 2 - 15    | [pSADPINDQSSLCVR] <sup>2+</sup>                        |                 |            | LTQ            |               |                |
| 2 - 15    | [pSADPINDQSSLCVR] <sup>3+</sup>                        |                 |            | LTQ            |               |                |
| 140 - 153 | [NSpSKEDFPIKLPER] <sup>3+</sup>                        |                 |            | LTQ            |               |                |
| 164 - 179 | [INGKSDVpSpTNNTAISK] <sup>2+</sup>                     |                 | LTQ        |                |               |                |
| 226 - 258 | [TVSIDDILNSpTLEHDSNSIEEQSLVDNEDYINK] <sup>3+</sup>     |                 |            |                | LTQ           |                |
| 295 - 322 | [FFSIYDKEETDKDDTDNKENEIIVNpTPR] <sup>4+</sup>          | QSTAR           |            |                |               |                |
| 323 - 359 | [NSTDKITpSPLNSPMAVQMNEEVEPPHGLALTLSEATK] <sup>4+</sup> | QSTAR           |            |                |               |                |
| 323 - 359 | [NSTDKITSPLNpSPMAVQMNEEVEPPHGLALTLSEATK] <sup>4+</sup> |                 | QSTAR      |                |               |                |
| 328 - 359 | [ITSPLNpSPMAVQMNEEVEPPHGLALTLSEATK] <sup>3+</sup>      |                 |            |                |               | LTQ            |
| 328 - 359 | [ITSPLNpSPMAVQMNEEVEPPHGLALTLSEATK] <sup>4+</sup>      | QSTAR           | QSTAR      |                |               |                |
| 375 - 384 | [SMNHVpSPITR] <sup>2+</sup>                            |                 |            | LTQ            |               |                |
| 521 - 541 | [AQpSpSLGpSpSKKQNSNDTApTNR] <sup>2+</sup>              |                 |            | LTQ            |               | LTQ            |
| 561 - 571 | [pTPPLESGPLFK] <sup>2+</sup>                           | QSTAR           |            |                |               |                |
| 682 - 699 | [ENIATSITVKpSPSSNSDR] <sup>2+</sup>                    |                 | LTQ        | LTQ            | LTQ           | LTQ            |
| 682 - 699 | [ENIATSITVKpSPSSNSDR] <sup>3+</sup>                    | QSTAR           | LTQ        | LTQ            |               | LTQ            |
| 682 - 700 | [ENIATpSITVKSPSSNSDRK] <sup>2+</sup>                   |                 | LTQ        |                |               |                |
| 682 - 700 | [ENIATSITVKpSPSSNSDRK] <sup>3+</sup>                   | QSTAR           | LTQ        |                | LTQ           | LTQ            |
| 682 - 700 | [ENIATSITVKpSPpSSNSDRK] <sup>3+</sup>                  |                 |            |                |               | LTQ            |
| 701 - 711 | [GSISNAPSPKPR] <sup>2+</sup>                           |                 |            |                |               | QSTAR          |
| 721 - 747 | [DHQVGDLQQRpSPNSSSGGTTNIAQK] <sup>3+</sup>             |                 | LTQ        | LTQ            | LTQ           | LTQ            |
| 721 - 747 | [DHQVGDLQQRpSPNSSSGGTTNIAQK] <sup>4+</sup>             |                 |            | QSTAR          | QSTAR         |                |
| 721 - 747 | [DHQVGDLQQRpSPNpSSSGGTTNIAQK] <sup>3+</sup>            |                 |            |                |               | LTQ            |

|           |                                                 |       |             |             |       |       |
|-----------|-------------------------------------------------|-------|-------------|-------------|-------|-------|
| 733 - 747 | [pSPNSSSSGGTTNIAQK] <sup>2+</sup>               |       |             |             |       | QSTAR |
| 757 - 774 | [VHDELPpSPGKVPLSPSPK] <sup>2+</sup>             |       |             | LTQ         | LTQ   |       |
| 757 - 774 | [VHDELPpSPGKVPLSPSPK] <sup>3+</sup>             |       |             | LTQ / QSTAR |       |       |
| 757 - 774 | [VHDELPSPGKVPLpSPSPK] <sup>2+</sup>             |       | LTQ         |             |       | LTQ   |
| 757 - 774 | [VHDELPSPGKVPLpSPSPK] <sup>3+</sup>             | QSTAR | LTQ / QSTAR |             | LTQ   |       |
| 757 - 774 | [VHDELPSPGKVPLpSPSPK] <sup>4+</sup>             | QSTAR |             |             |       |       |
| 757 - 774 | [VHDELPpSPGKVPLpSPSPK] <sup>2+</sup>            |       |             | LTQ         |       |       |
| 757 - 774 | [VHDELPpSPGKVPLpSPSPK] <sup>3+</sup>            | QSTAR | LTQ / QSTAR | QSTAR       | QSTAR | LTQ   |
| 757 - 774 | [VHDELPpSPGKVPLSPpSPK] <sup>2+</sup>            |       | LTQ         |             |       |       |
| 757 - 774 | [VHDELPpSPGKVPLSPpSPK] <sup>3+</sup>            | QSTAR |             |             |       |       |
| 757 - 774 | [VHDELPSPGKVPLpSPpSPK] <sup>2+</sup>            |       |             |             | LTQ   | LTQ   |
| 757 - 774 | [VHDELPSPGKVPLpSPpSPK] <sup>3+</sup>            |       |             |             |       | QSTAR |
| 757 - 774 | [VHDELPpSPGKVPLpSPpSPK] <sup>2+</sup>           |       | LTQ         | LTQ         | LTQ   | LTQ   |
| 757 - 774 | [VHDELPpSPGKVPLpSPpSPK] <sup>3+</sup>           | QSTAR | LTQ         | LTQ / QSTAR | QSTAR | QSTAR |
| 767 - 774 | [VPLSPpSPK] <sup>2+</sup>                       |       |             | LTQ         |       |       |
| 775 - 793 | [RLDpYTPDGSHLYGSSLQAR] <sup>3+</sup>            |       |             |             | LTQ   |       |
| 775 - 793 | [RLDYpTPDGSHLYGSSLQAR] <sup>2+</sup>            |       | LTQ         |             |       |       |
| 775 - 793 | [RLDYpTPDGSHLYGSSLQAR] <sup>3+</sup>            | QSTAR |             |             |       |       |
| 776 - 793 | [LDpYpTPDGpSHLYGSSLQAR] <sup>3+</sup>           |       | LTQ         |             |       |       |
| 828 - 855 | [SGpSQpTLVEEIEIENFAQNNLSHSDTLSPK] <sup>4+</sup> |       |             | QSTAR       |       | QSTAR |
| 878 - 896 | [LPDPVLpSFpSIYDALIDLVR] <sup>3+</sup>           |       |             |             | QSTAR |       |
| 911 - 926 | [FLDpSPQKVTIYEMVLK] <sup>2+</sup>               |       |             | LTQ         |       |       |
| 918 - 944 | [VTIYEMVLKpSLLIFKILPVEHQEVLK] <sup>3+</sup>     |       |             | LTQ         |       |       |

NB: phosphorylation sites are indicated by lowercase "p" prior to phosphorylated residue. Observed charge states indicated in superscript following peptide. LTQ, QSTAR – peptide(s) identified using the LTQ and QSTAR mass spectrometers, respectively.
