# Supplementary material
Source: PubMed Central journal article supplement (PMC2063489)

# Sopko\_Supplemental Figure 1

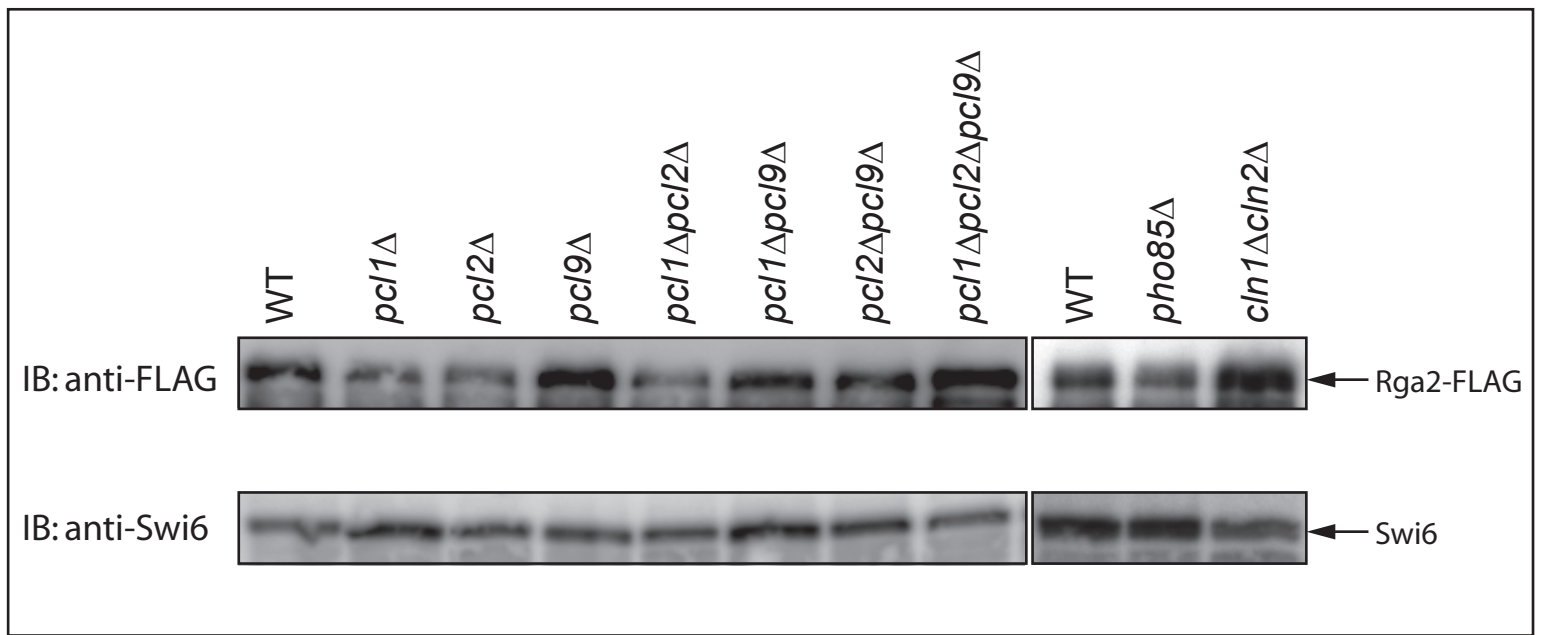

Supplement: 7601847s2.pdf [file 7601847s2.pdf]

Sopko\_Supplemental Figure 2

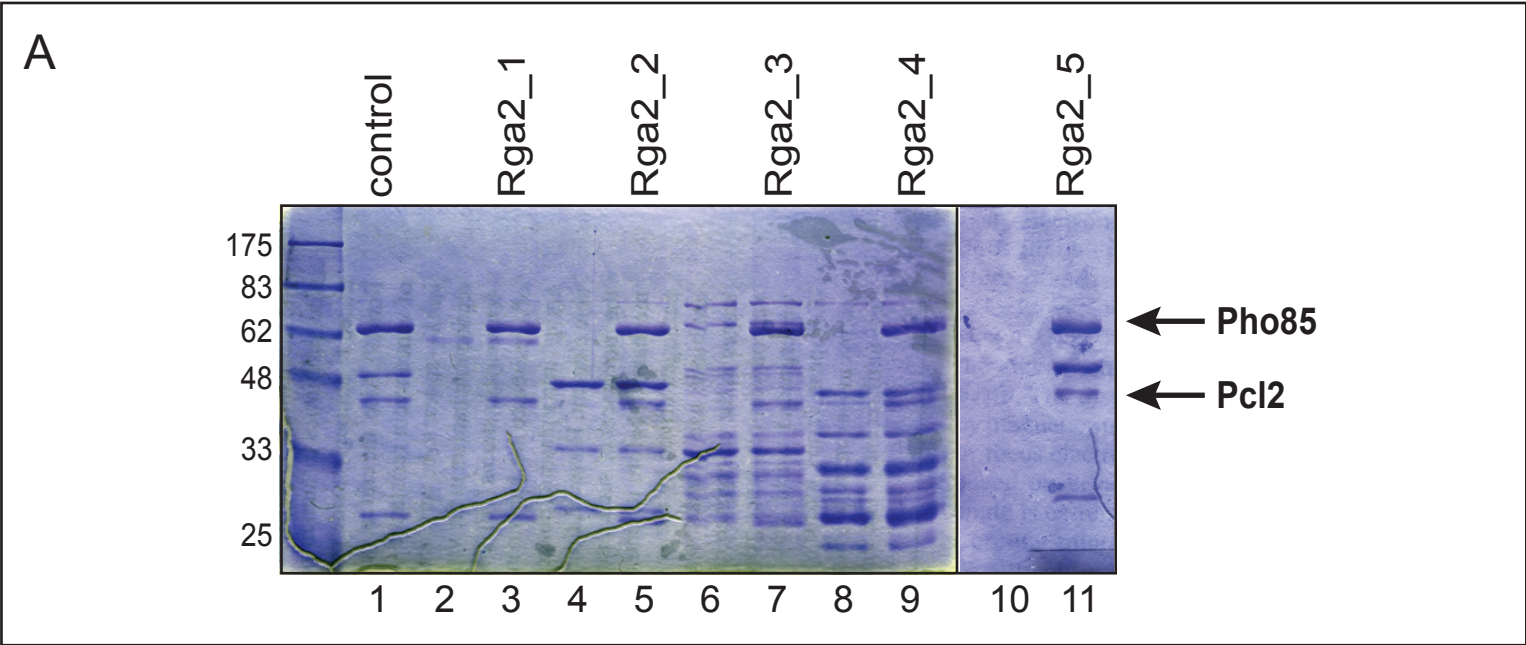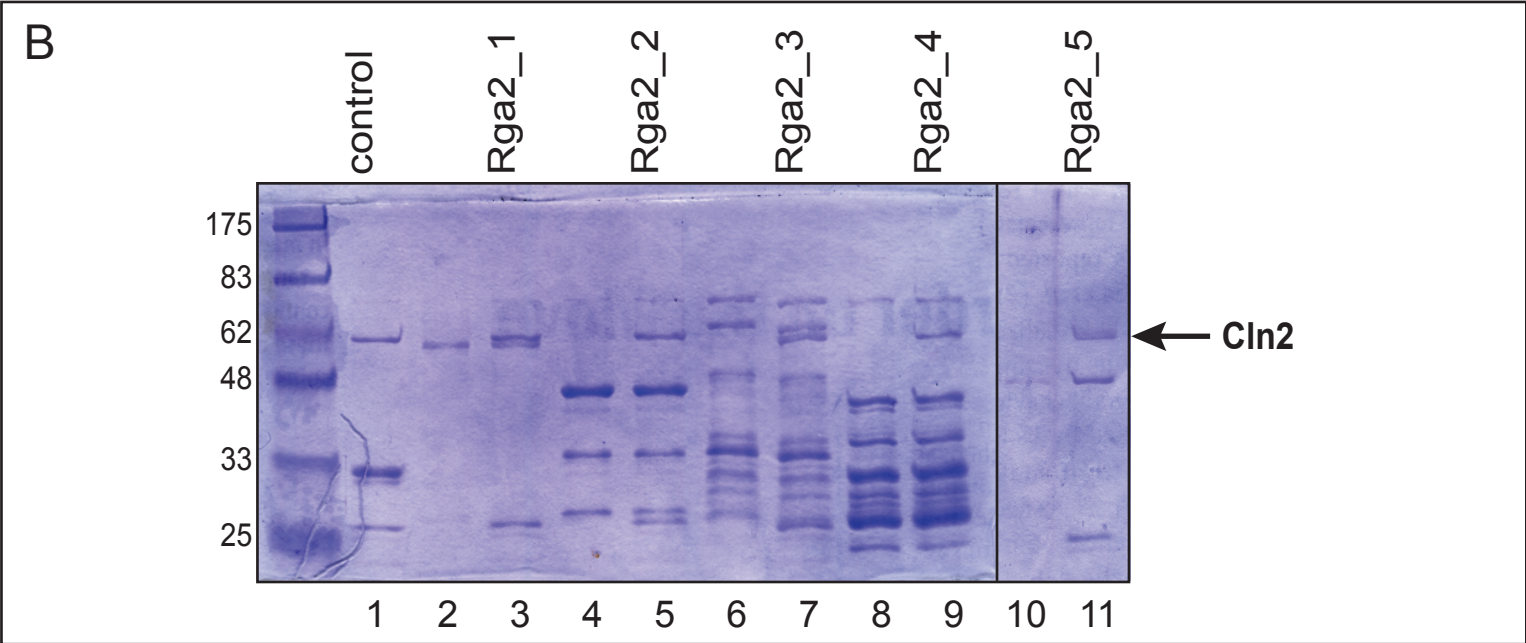

Supplement: 7601847s3.pdf [file 7601847s3.pdf]

# Sopko\_Supplemental Figure 3

A

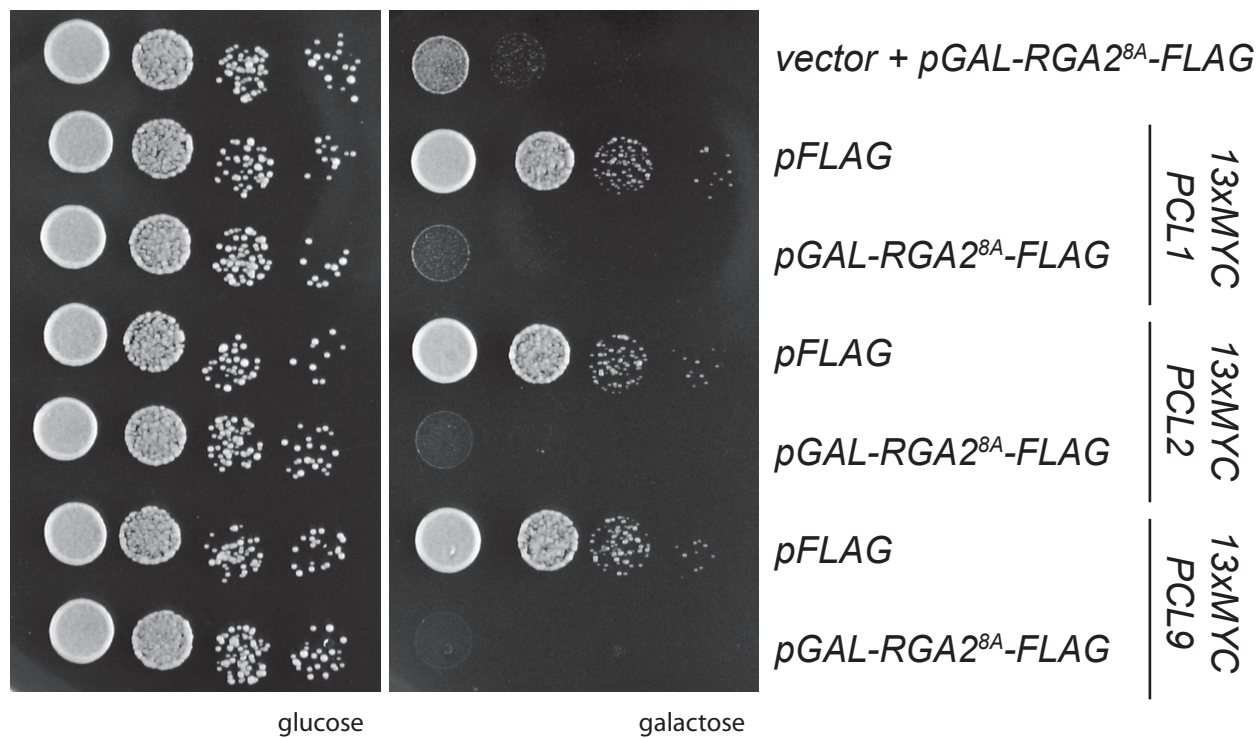

B

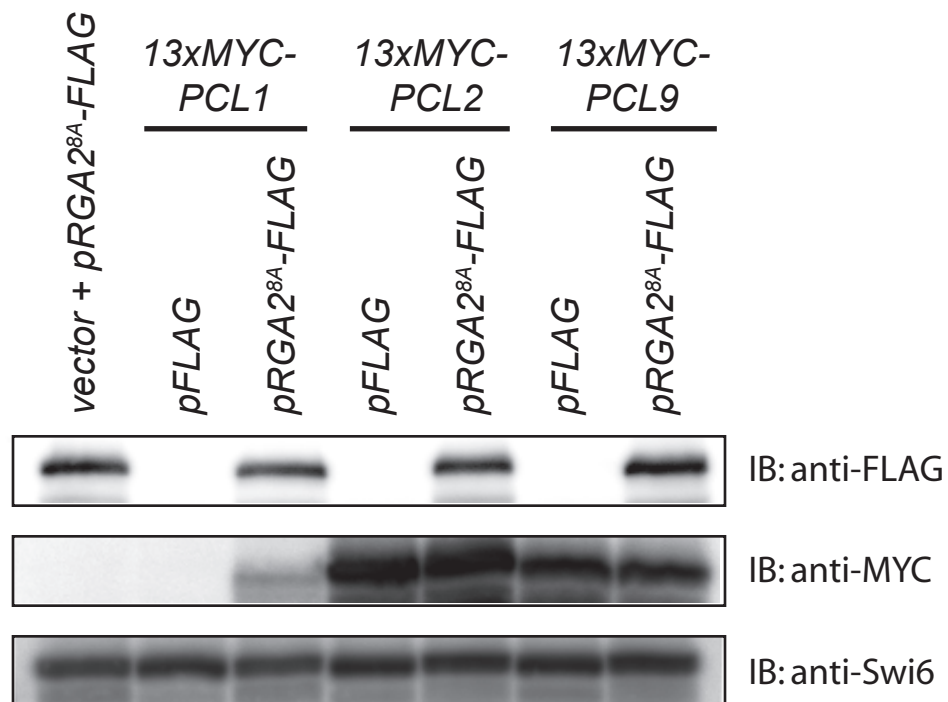

Supplement: 7601847s4.pdf [file 7601847s4.pdf]

Sopko\_Supplemental Figure 4

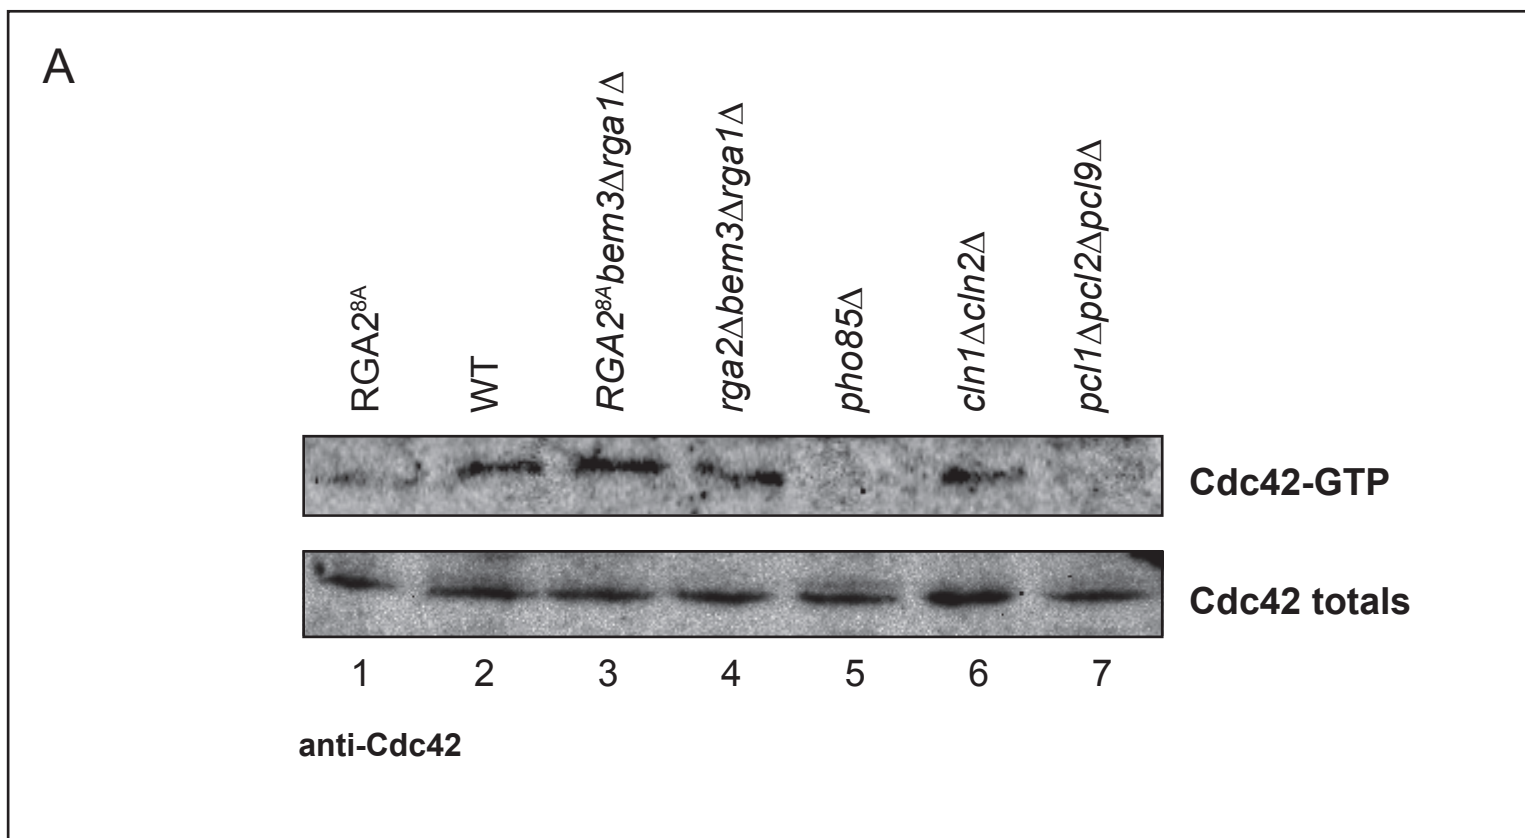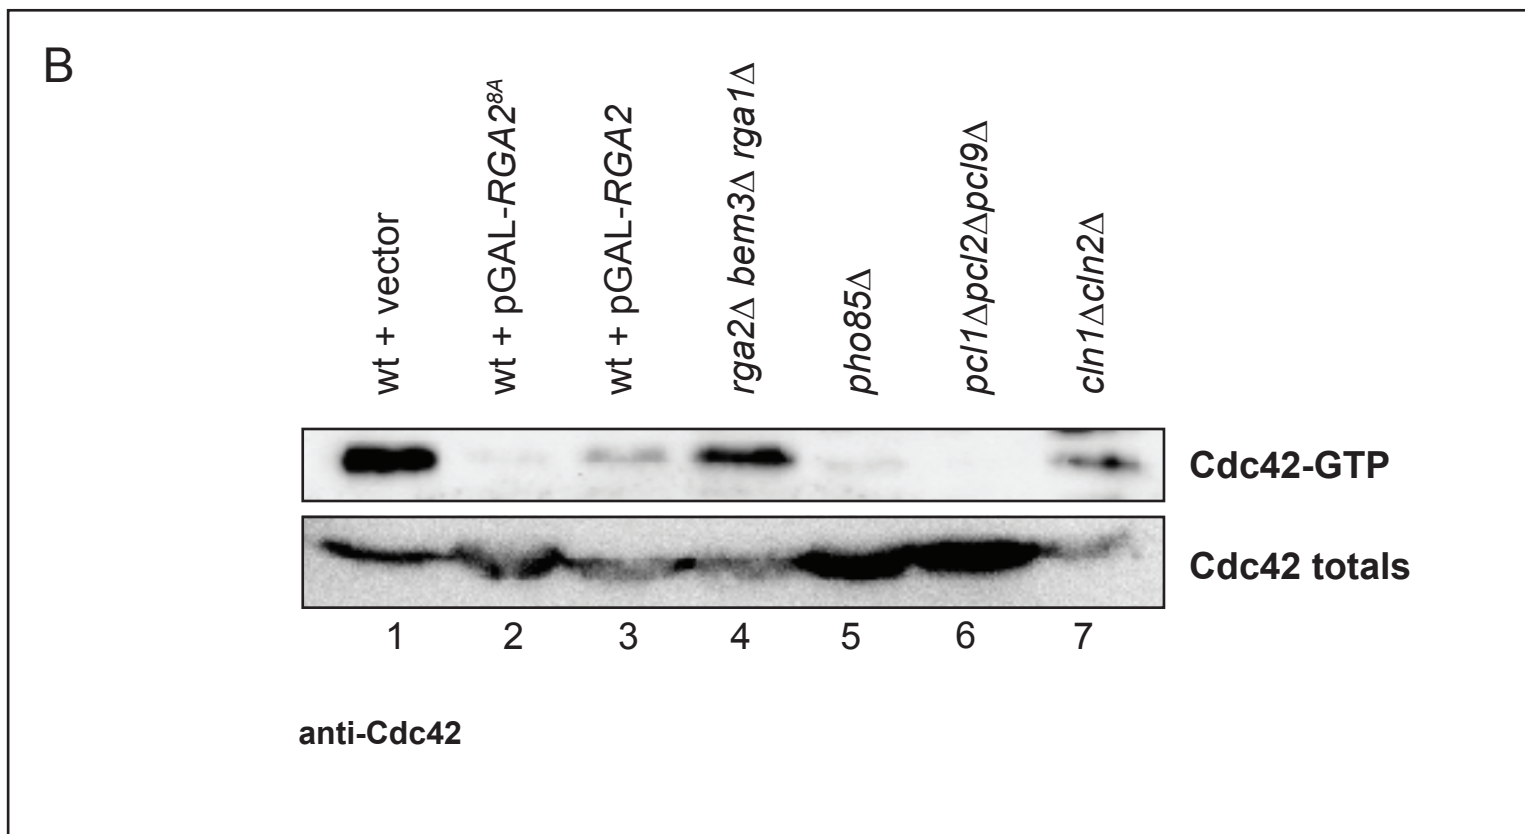

Supplement: 7601847s5.pdf [file 7601847s5.pdf]

Sopko\_Supplemental Figure 5

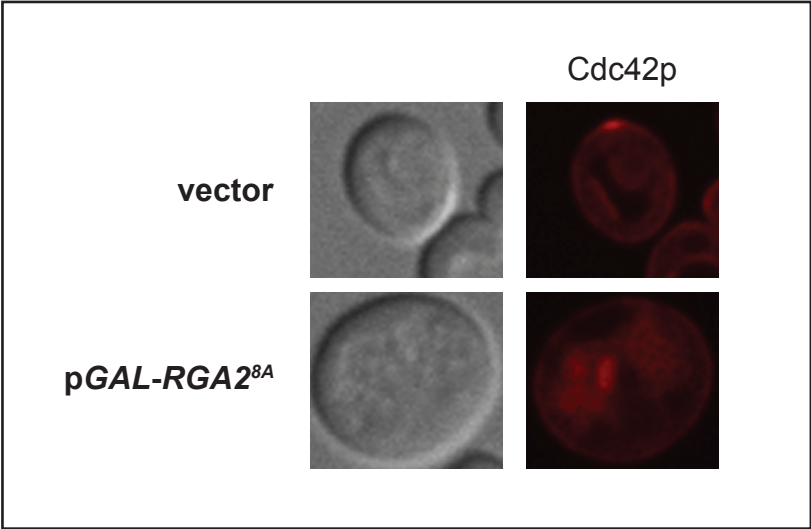

Supplement: 7601847s6.pdf [file 7601847s6.pdf]
